# Supplementary material
Source: HighWire-hosted journal article supplement (https://thorax.bmj.com/content/thoraxjnl-2018-211715)
Supplement: inline-supplementary-material-1 [file inline-supplementary-material-1.pdf]

**Table S1. Demographics of Included Versus Excluded Participants.**

| <b>Characteristic</b>           | <b>Included Participants (N=10740)</b> | <b>Excluded Participants (N=1394)</b> | <b>p-value</b>   |
|---------------------------------|----------------------------------------|---------------------------------------|------------------|
| <b>Mean age (SD)</b>            | <b>32.2 (17.5)</b>                     | <b>35.7 (17.1)</b>                    | <b>&lt;0.001</b> |
| <b>Foreign-born</b>             | <b>8685 (80.9%)</b>                    | <b>1093 (78.4%)</b>                   | <b>0.032</b>     |
| <b>Close contact to TB case</b> | <b>991 (9.2%)</b>                      | <b>110 (7.9%)</b>                     | <b>0.11</b>      |
| <b>HIV-seropositive</b>         | <b>1370 (12.8%)</b>                    | <b>101 (7.2%)</b>                     | <b>&lt;0.001</b> |

**Table S2.** Data Used to Calculate Prior Estimates of Sensitivity for the Tuberculin Skin Test and Interferon- $\gamma$  Release (IGRA) Assays, with Progression to Active Tuberculosis as the Reference Standard.

| Study                                            | Group at High Risk                | Country                          | Yr(s)     | Duration of Follow-Up, Yrs | Total Subjects, No.              | Positive QFT, No. (%) | Progressed to Active TB, No. (%)                             | QFT Sensitivity for All Cases of Active TB (%) | Positive TSPOT, No. (%) | Progressed to Active TB, No., (%)                       | TSPOT Sensitivity for All Cases of Active TB (%) |
|--------------------------------------------------|-----------------------------------|----------------------------------|-----------|----------------------------|----------------------------------|-----------------------|--------------------------------------------------------------|------------------------------------------------|-------------------------|---------------------------------------------------------|--------------------------------------------------|
| Zellweger et al. AJRCCM 2015 <sup>1</sup>        | TB contacts                       | Low incidence European countries | 2009–2011 | ≤2.5                       | 5,020<br>3895 QFT<br>1,125 TSPOT | 1,068/3,895 (27.4)    | 14/421 (3.3) w/o prev therapy<br>3/481 (0.6) w/ prev therapy | 17/20 (85.0)                                   | 299/1125 (26.6)         | 2/73 (2.7) w/o prev therapy<br>0/208 (0) w/prev therapy | 2/4 (50.0)                                       |
| Diel et al. AJRCCM 2008 <sup>2</sup>             | TB contacts                       | Germany                          | 2005–2006 | 2                          | 601                              | 66 (11.0)             | 6/41 (14.6)                                                  | 6/6 (100)                                      | N/A                     | N/A                                                     | N/A                                              |
| Diel et al. AJRCCM 2011 <sup>3</sup><br>(update) | TB contacts                       | Germany                          | 2005–2008 | 4                          | 954                              | 198 (20.8)            | 19/147 (12.9)                                                | 19/19 (100)                                    | N/A                     | N/A                                                     | N/A                                              |
| Hill et al. PLoS One 2008 <sup>4</sup>           | TB contacts                       | Gambia                           | 2002–2004 | 2                          | 2348                             | N/A                   | N/A                                                          | N/A                                            | 649/1736 (37.4)         | 11/649 (1.7)                                            | 11/21 (52.4)                                     |
| Kik et al. Eur Respir J 2010 <sup>5</sup>        | TB contacts                       | The Netherlands                  | 2005–2007 | 2                          | 339                              | 178/327 (54.4)        | 5/178 (2.8)                                                  | 5/8 (62.5)                                     | 181/299 (60.5)          | 6/181 (3.3)                                             | 6/8 (75.0)                                       |
| Lienhardt et al., PLoS One 2010 <sup>6</sup>     | TB contacts                       | Senegal                          | 2004–2006 | 2                          | 2679                             | N/A                   | N/A                                                          | N/A                                            | 544/952 (57.1)          | 17/544 (3.1)                                            | 17/23 (73.9)                                     |
| Yoshiyama et al. IJTLD 2010 <sup>7</sup>         | TB contacts                       | Japan                            | 2003–2005 | 2                          | 3102                             | 419/3,102 (13.5)      | 20/419 (4.8)                                                 | 20/39 (51.3)                                   | N/A                     | N/A                                                     | N/A                                              |
| Higuchi et al. Resp 2007 <sup>8</sup>            | TB contacts (students)            | Japan                            | 2002      | 3.5                        | 349                              | 4/88 (4.5)            | 0/4 (0)                                                      | N/A                                            | N/A                     | N/A                                                     | N/A                                              |
| Bradshaw et al. PLoS One 2011 <sup>9</sup>       | TB contacts (health care workers) | Ireland                          | 2007      | 3                          | 389                              | 37/389 (9.5)          | 0/37 (0)                                                     | N/A                                            | N/A                     | N/A                                                     | N/A                                              |
| Song et al. Chest 2012                           | TB contacts (high                 | Korea                            | 2007      | 2                          | 1,826                            | 203/270 (75.2), but   | 11/203 (5.4)                                                 | 11/11 (100)                                    | N/A                     | N/A                                                     | N/A                                              |

| Study                                                   | Group at High Risk                     | Country               | Yr(s)     | Duration of Follow-Up, Yrs | Total Subjects, No. | Positive QFT, No. (%)                                     | Progressed to Active TB, No. (%) | QFT Sensitivity for All Cases of Active TB (%) | Positive TSPOT, No. (%) | Progressed to Active TB, No., (%) | TSPOT Sensitivity for All Cases of Active TB (%) |
|---------------------------------------------------------|----------------------------------------|-----------------------|-----------|----------------------------|---------------------|-----------------------------------------------------------|----------------------------------|------------------------------------------------|-------------------------|-----------------------------------|--------------------------------------------------|
| <sup>10</sup>                                           | school)                                |                       |           |                            |                     | only IGRA tested among 270/1,826 (14.8) with positive TST |                                  |                                                |                         |                                   |                                                  |
| Bakir et al. Ann Intern Med 2008 <sup>11</sup>          | Children TB contacts (aged 1–16 yrs)   | Turkey                | 2002–2004 | 1.3                        | 908                 | N/A                                                       | N/A                              | N/A                                            | 381 (42.0)              | 11/381 (2.9)                      | 11/15 (73.3)                                     |
| Kruczak et al. Scand J Infect Dis 2014 <sup>12</sup>    | Homeless, TB contacts, low risk groups | Krakow, Poland        | 2007–2009 | 4-5                        | 785                 | 211/779 (27.1)                                            | 8/211 (3.8)                      | 8/12 (66.7)                                    | N/A                     | N/A                               | N/A                                              |
| Pullar et al. BMC ID 2014 <sup>13</sup>                 | HIV-positive adults                    | Norway                | 2009–2010 | 2                          | 304                 | 77/298 (25.8)                                             | 0/77 (0)                         | N/A                                            | 29/117 (24.8)           | 0/29 (0)                          | N/A                                              |
| Santin et al. Diagn Micro Infect Dis 2011 <sup>14</sup> | HIV-positive adults                    | Spain                 | 2007–2009 | ~2                         | 135                 | 13/135 (9.6)                                              | 0/13 (0)                         | N/A                                            | N/A                     | N/A                               | N/A                                              |
| Aichelburg et al. CID 2009 <sup>15</sup>                | HIV-positive adults                    | Austria               | 2006–2007 | 19 mos.                    | 830                 | 44 (5.3)                                                  | 3/36 (8.3)                       | 3/3 (100)                                      | N/A                     | N/A                               | N/A                                              |
| Jonnalagadda et al. J Inf Dis 2010 <sup>16</sup>        | HIV-positive pregnant women            | Kenya                 | 1999–2005 | 2                          | 333                 | N/A                                                       | N/A                              | N/A                                            | 120/281 (42.7)          | 6/110 (5.5)                       | 6/9 (66.7)                                       |
| Lange et al. IJTLD 2012 <sup>17</sup>                   | Immuno-compromised (only 11% HIV)      | Germany               | 2006–2007 | 28 mos.                    | 460                 | 38(8.3)                                                   | 1/38 (2.6)                       | 1/1 (100)                                      | N/A                     | N/A                               | N/A                                              |
| Sester et al. AJRCCM 2014 <sup>18</sup>                 | Immuno-compromised (50% HIV-positive)  | 11 European countries | 2008–2011 | 5                          | 1,537               | 239/1,423 (16.8)                                          | 3/215 (1.4)                      | 3/8 (37.5)                                     | 266/1378 (19.3)         | 4/247 (1.6)                       | 4/10 (40.0)                                      |
| Lee et al. Infect 2009                                  | End-stage renal                        | Taiwan                | 2005      | 2                          | 32                  | 12/30 (40.0)                                              | 1/12 (8.3)                       | 1/1 (100)                                      | 15/32 (46.9)            | 0/15 (0)                          | 0/2 (0)                                          |

| Study                                             | Group at High Risk                                       | Country      | Yr(s)     | Duration of Follow-Up, Yrs | Total Subjects, No. | Positive QFT, No. (%) | Progressed to Active TB, No. (%) | QFT Sensitivity for All Cases of Active TB (%) | Positive TSPOT, No. (%) | Progressed to Active TB, No., (%) | TSPOT Sensitivity for All Cases of Active TB (%) |
|---------------------------------------------------|----------------------------------------------------------|--------------|-----------|----------------------------|---------------------|-----------------------|----------------------------------|------------------------------------------------|-------------------------|-----------------------------------|--------------------------------------------------|
| <sup>19</sup>                                     | disease                                                  |              |           |                            |                     |                       |                                  |                                                |                         |                                   |                                                  |
| Chang et al. Clin Rheum 2011 <sup>20</sup>        | Inflammatory arthritis                                   | Korea        | 2007–2009 | 1.5                        | 100                 | 36/100 (36.0)         | 0/36 (0)                         | N/A                                            | N/A                     | N/A                               | N/A                                              |
| Leung et al. AJRCCM 2010 <sup>21</sup>            | Silicosis (males)                                        | Hong Kong    | 2004–2008 | 2                          | 308                 | N/A                   | N/A                              | N/A                                            | 204/308 (66.2)          | 15/204 (7.4)                      | 15/17 (88.2)                                     |
| Kim et al. Am J Transplant 2011 <sup>22</sup>     | Kidney transplants                                       | Korea        | 2008–2009 | 1.5                        | 312                 | N/A                   | N/A                              | N/A                                            | 89/296 (30.1)           | 4/89 (4.5)                        | 4/4 (100)                                        |
| Harstad et al. IJTLD 2010 <sup>23</sup>           | Asylum seekers                                           | Norway       | 2005–2006 | 23–32 mos.                 | 832                 | 246 (29.9)            | 8/246 (3.3)                      | 8/9 (88.9)                                     | N/A                     | N/A                               | N/A                                              |
| Mahomed et al. PLoS One 2011 <sup>24</sup>        | Children aged 12–18 yrs                                  | South Africa | 2005–2009 | 3.8                        | 5,244               | 2669/5244 (50.9)      | 39/2669 (0.3)                    | 39/52 (75.0)                                   | N/A                     | N/A                               | N/A                                              |
| Schablon et al. BMC Infect Dis 2011 <sup>25</sup> | Nursing students                                         | Germany      | 2008–2009 | 2                          | 194                 | 2/180 (1.1)           | 0/2 (0)                          | N/A                                            | N/A                     | N/A                               | N/A                                              |
| Mandalakas et al. AJRCCM 2015 <sup>26</sup>       | Children TB contacts (3 mos.–15 years, 22% HIV-positive) | South Africa | 2008–2012 | 3 mos.                     | 1,343               | 520/1261 (41.2)       | 85/1343 (6.3)                    | 54/76 (71.1)                                   | 302/991 (30.5)          | 85/1343 (6.3)                     | 45/72 (62.5)                                     |

Abbreviations: LTBI = latent tuberculosis infection; N/A = not applicable; IGRA = interferon- $\gamma$  release assay; QFT = QuantiFERON<sup>®</sup> Gold In-Tube; TB = tuberculosis; TSPOT = T-SPOT<sup>®</sup>.TB

**Table S3.** Data Used to Calculate Prior Estimates of TST Sensitivity for Latent Tuberculosis Infection, with Progression to Active Tuberculosis as the Reference Standard

| Study                                                                       | Group at High Risk                                           | Country                                                         | Yr(s)             | Duration of Follow-Up | Subjects, No.                        | Positive TST, No. (%)                               | Progressed to Active TB, No. (%) | TST Sensitivity for All Cases of Active TB             |
|-----------------------------------------------------------------------------|--------------------------------------------------------------|-----------------------------------------------------------------|-------------------|-----------------------|--------------------------------------|-----------------------------------------------------|----------------------------------|--------------------------------------------------------|
| Kik et al., Eur Respir J 2010 <sup>5</sup>                                  | Close Contacts (aged $\geq 16$ yrs)<br>HIV-positive excluded | Netherlands (8% born in Europe, 8% S. Am, 36% Asia, 46% Africa) | Apr 2005–Jul 2007 | 2 yrs                 | 339 (only $>5$ mm TST were followed) | $\geq 10$ mm = 279<br>$\geq 15$ mm = 177            | 9                                | $\geq 10$ mm = 9/9 (100%)<br>$\geq 15$ mm = 8/9 (88%)  |
| Diel et al. AJRCCM 2008. Updated in Diel et al., AJRCCM 2011 <sup>2,3</sup> | Close Contacts (age 0–60 yrs)                                | Germany<br>59% German-born, 41% not German-born                 | May 2005–Apr 2008 | $\geq 2$ yrs          | 954                                  | $\geq 5$ mm = 604 (63%)<br>$\geq 10$ mm = 242 (25%) | 19                               | $\geq 5$ mm = 17/19 (89%)<br>$\geq 10$ mm = 8/19 (42%) |
| Sackoff et al., IJTL D 2001 <sup>27</sup>                                   | HIV-positive (median CD4 <sup>+</sup> 186)                   | U.S. (New York)                                                 | Jan 1995–Dec 1995 | 6–12 mos.             | 2,197                                | $\geq 5$ mm = 439                                   | 23                               | $\geq 5$ mm = 9/23 (39%)                               |
| Zhang et al. Chin Med J 2013 <sup>28</sup>                                  | Healthcare workers                                           | Beijing                                                         | Unknown           | 60 mos.               | 101                                  | $\geq 10$ mm = 53                                   | 1                                | $\geq 10$ mm = 1/1 (100%)                              |
| Torres Costa et al., J Occup Med Toxicol 2011 <sup>29</sup>                 | Healthcare workers                                           | Portugal                                                        | Jan 2007–Dec 2010 | Mean 19 mos.          | 2,884                                | $\geq 10$ mm = 2,102                                | 4                                | $\geq 10$ mm = 4/4 (100%)                              |
| Bakir et al. Annals 2008 <sup>11</sup>                                      | Pediatric close contacts 1 mo.–16 yrs                        | Turkey                                                          | Oct 2002          | Mean 1.3 yrs          | 908                                  | $\geq 5$ mm = 550                                   | 15                               | $\geq 5$ mm = 12/15 (80%)                              |
| Chang et al. Clin Rheum 2011 <sup>20</sup>                                  | Adults with arthritis                                        | South Korea                                                     | Aug 2007–Jul 2009 | Median 18 mos.        | 107                                  | $\geq 10$ mm = 36                                   | 0                                | N/A                                                    |

| Study                                         | Group at High Risk                         | Country       | Yr(s)             | Duration of Follow-Up | Subjects, No. | Positive TST, No. (%)                                | Progressed to Active TB, No. (%)    | TST Sensitivity for All Cases of Active TB           |
|-----------------------------------------------|--------------------------------------------|---------------|-------------------|-----------------------|---------------|------------------------------------------------------|-------------------------------------|------------------------------------------------------|
| Comstock et al. AJE 1974 <sup>30</sup>        | Children 1–19 yrs                          | Puerto Rico   | 1949–1951         | ~19 yrs               | 191,827       | ≥6mm = 82,269                                        | 1,400                               | ≥6 mm = 1400/1400 (100%)                             |
| Daley et al. AJRCCM 1998; <sup>31</sup>       | Adult intravenous drug users<br>30.5% HIV+ | San Francisco | 1990–1994         | Median 22 mos.        | 1109          | ≥5 mm HIV-positive = 96<br>≥10 mm HIV-negative = 336 | 8 (5 HIV-positive, 3 HIV-negative,) | HIV-positive = 3/5 (60%)<br>HIV-negative = 2/3 (67%) |
| Del Corral et al. PLOS One 2009 <sup>32</sup> | Close Contacts (4% HIV+)                   | Columbia      | Mar 2005–Dec 2006 | 2 yrs                 | 502           | ≥10 mm = 331                                         | 37                                  | Unclear how many cases were TST-positive             |
| Giri et al. Occ Med 2014 <sup>33</sup>        | Healthcare workers                         | UK            | Apr 2009–Mar 2012 | <3 yrs                | 788           | ≥6 mm = 191                                          | 0                                   | N/A                                                  |
| Gourevitch et al. AIDS 1999 <sup>34</sup>     | HIV+ (CD4 range 6-1980)                    | NYC           | 1985–1996         | <11 yrs               | 431           | ≥5 mm = 202                                          | 25                                  | 16/25 (64%)                                          |
| Guwatudde et al. AJE 2003 <sup>35</sup>       | Contacts (age 0->35y; 10% HIV+)            | Uganda        | Oct 1995–Feb 1999 | 2 yrs                 | 1206          | ≥5 mm = 963<br>≥10 mm = 801                          | 25                                  | ≥5 mm = 23/25 (92%)<br>≥10 mm = 20/25 (80%)          |
| Harstad et al. IJTLD 2010 <sup>23</sup>       | Adult asylum seekers                       | Norway        | Sept 2005–Jun2006 | 23–32 mos.            | 823           | ≥6 mm = 426<br>≥15 mm = 128                          | 9                                   | ≥6mm = 8/9 (89%)<br>≥15 mm = 3/9 (33%)               |
| Higuchi et al. Resp 2007 <sup>8</sup>         | School children                            | Japan         | Dec 2002          | 3.5 yrs.              | 349           | ≥30 mm = 95                                          | 0                                   | N/A                                                  |
| Higuchi et al. J Inf 2009 <sup>36</sup>       | School children                            | Japan         | Jan–Feb 2006      | 3 yrs.                | 306           | ≥5 mm = 200<br>≥10 mm = 90                           | 0                                   | N/A                                                  |
| Hill et al. PLOS One 2008 <sup>4</sup>        | Close contacts >15y (2% HIV+)              | Gambia        | Jun 2002–Oct 2004 | 2 yrs.                | 2348          | ≥10 mm = 843                                         | 26                                  | 14/26 (54%)                                          |

| <b>Study</b>                                         | <b>Group at High Risk</b>                                 | <b>Country</b> | <b>Yr(s)</b>       | <b>Duration of Follow-Up</b> | <b>Subjects, No.</b> | <b>Positive TST, No. (%)</b> | <b>Progressed to Active TB, No. (%)</b> | <b>TST Sensitivity for All Cases of Active TB</b> |
|------------------------------------------------------|-----------------------------------------------------------|----------------|--------------------|------------------------------|----------------------|------------------------------|-----------------------------------------|---------------------------------------------------|
| Jeyakumar et al. Med J Malaysia 1999 <sup>37</sup>   | Nursing students                                          | Malaysia       | Jan 1994–Dec 1996  | 2 yrs                        | 366                  | ≥15 mm = 102                 | 4                                       | 3/4 (75%)                                         |
| Kim et al. AJT 2011 <sup>22</sup>                    | Renal transplant                                          | Korea          | Jun 2008–Dec 2009  | >1 yrs                       | 296                  | ≥10 mm = 24                  | 4                                       | 0/4 (0%)                                          |
| Kruczak et al. Scand J Infect Dis 2014 <sup>12</sup> | Homeless, contacts, and Long term care facility residents | Poland         | Jul 2007–Sept 2009 | 4–5 yrs                      | 701                  | >10 mm = 338                 | 12                                      | 7/12 (58%)                                        |
| Lee et al. Infection 2009 <sup>19</sup>              | End stage renal disease                                   | Taiwan         | Sept 2005          | 2 yrs                        | 32                   | ≥10 mm = 20                  | 2                                       | 1/2 (50%)                                         |
| Lee et al. Infection 2009 <sup>19</sup>              | Healthy controls                                          | Taiwan         | Sept 2005          | 2 yrs                        | 32                   | ≥10 mm = 21                  | 0                                       | N/A                                               |
| Leow et al. Exp Clin Endo Diab 2014 <sup>38</sup>    | Diabetics                                                 | Singapore      | Feb 2007–Feb 2012  | >1 yrs                       | 220                  | ≥10 mm = 63                  | 0                                       | N/A                                               |
| Leung et al. Arch Ped Adol Med 2006 <sup>39</sup>    | School children                                           | Hong Kong      | 1999               | 4 yrs                        | 656                  | ≥20 mm = 656                 | 10                                      | 10/10 (100%)                                      |
| Leung et al. AJRCCM 2010 <sup>21</sup>               | Persons with Silicosis                                    | Hong Kong      | Dec 2004–Dec 2008  | >1 yrs                       | 308                  | >10 mm = 203                 | 17                                      | 13/17 (76%)                                       |
| Lienhardt et al. PLOS One 2010 <sup>6</sup>          | Contacts (>18y)                                           | Senegal        | Mar 2004–Apr 2006  | 2 yrs                        | 2,458                | ≥10 mm = 1,591               | 52                                      | 39/52 (75%)                                       |
| Mahomed et al. PLOS ONE 2011; <sup>24</sup>          | Adolescents                                               | South Africa   | 2005–2009          | ~2 yrs                       | 5,244                | ≥10 mm = 2,894               | 52                                      | 40/52 (77%)                                       |
| Markowitz et al.                                     | HIV+ (median                                              | U.S.           | Nov                | ~4.5 yrs                     | 1,130                | ≥5 mm = 66                   | 28                                      | 8/28 (29%)                                        |

| Study                                                   | Group at High Risk             | Country    | Yr(s)             | Duration of Follow-Up | Subjects, No. | Positive TST, No. (%)    | Progressed to Active TB, No. (%) | TST Sensitivity for All Cases of Active TB |
|---------------------------------------------------------|--------------------------------|------------|-------------------|-----------------------|---------------|--------------------------|----------------------------------|--------------------------------------------|
| Ann Int Med 1997 <sup>40</sup>                          | CD4+ 410)                      |            | 1988–Feb 1990     |                       |               |                          |                                  |                                            |
| Pullar et al. BMC Inf Dis 2014 <sup>13</sup>            | HIV+ (CD4 ~40-488)             | Norway     | Jan 2009–Oct 2010 | 2 yrs                 | 217           | ≥5 mm = 52               | 0                                | N/A                                        |
| Rakotosamimanana et al. Eur Respir J 2015 <sup>41</sup> | Contacts >1y, all HIV-         | Madagascar | Unknown           | 18 mos.               | 289           | ≥14 mm = 123             | 12                               | 10/12 (83%)                                |
| Doherty et al. JCM 2002 <sup>42</sup>                   | Contacts (<5% HIV+)            | Ethiopia   | Unknown           | 2 yrs                 | 24            | In vitro PPD stimulation | 7                                | 7/7 (100%)                                 |
| Rueda et al. IJTLD 2014 <sup>43</sup>                   | Incarcerated men (<1% HIV+)    | Colombia   | Nov 2012–Dec 2013 | 1 yrs                 | 829           | 643 (78%)                | 4                                | 4/4 (100%)                                 |
| Santin et al. Diag Micro and Inf Dis 2011 <sup>14</sup> | HIV+ (Median CD4 = 300)        | Spain      | Mar 2007–Nov 2009 | Median 600 days       | 135           | ≥5 mm = 9                | 0                                | N/A                                        |
| Selwyn et al. JAMA 1992 <sup>44</sup>                   | HIV+ intravenous drug users    | U.S.       | Jun 1988–Dec 1990 | 31 mos.               | 120           | ≥5 mm HIV-positive = 52  | 5                                | 0/5 (0%)                                   |
| Sester et al. AJRCCM 2014; <sup>18</sup>                | HIV+ (Median CD4 302)          | Europe     | Jun 2008–May 2011 | Median 1.8 yrs        | 768           | ≥5 mm = 67               | 10                               | 4/10 (40%)                                 |
| Silverman et al. Clin Biochem 2007 <sup>45</sup>        | Bladder CA with BCG            | Canada     | Jun–Jul 2004      | 2 yrs                 | 22            | ≥5 mm = 15               | 0                                | N/A                                        |
| Song et al. Chest 2012 <sup>10</sup>                    | School aged pediatric contacts | Korea      | May–Jul 2007      | 2 yrs                 | 1,826         | ≥10 mm = 270             | 21                               | 11/21 (52%)                                |
| Thomas et al.                                           | Children                       | Bangladesh | Apr–Jun           | 1 yr                  | 302           | ≥10 mm = 101             | 0                                | N/A                                        |



| Study                                         | Group at High Risk                        | Country                 | Yr(s)             | Duration of Follow-Up | Subjects, No.                                | Positive TST, No. (%)                                      | Progressed to Active TB, No. (%) | TST Sensitivity for All Cases of Active TB |
|-----------------------------------------------|-------------------------------------------|-------------------------|-------------------|-----------------------|----------------------------------------------|------------------------------------------------------------|----------------------------------|--------------------------------------------|
| Pediatrics 2010 <sup>46</sup>                 |                                           |                         | 2009              |                       |                                              |                                                            |                                  |                                            |
| Wyndham–Thomas BMC Inf Dis 2015 <sup>47</sup> | HIV+ (Median CD4 517)                     | Belgium                 | Dec 2011–Dec 2012 | 1 yr                  | 46                                           | ≥5 mm = 4                                                  | 0                                | N/A                                        |
| Joshi et al. Eur Resp J 2011 <sup>48</sup>    | Healthcare workers                        | India                   | Jan–Jun 2004      | 6 yrs                 | 719                                          | TST- and QFT-IT positive = 217                             | 14                               | 6/14 (43%)                                 |
| Yoshiyama et al. IJTLD 2010 <sup>7</sup>      | Contacts                                  | Japan                   | 2003–2005         | ~579 days             | 856                                          | ≥10 mm = 679                                               | 12                               | 10/12 (83%)                                |
| Sloot et al. AJRCCM 2014 <sup>49</sup>        | Contacts (~7% HIV+)                       | Netherlands             | 2002–2011         | >10 mos.              | 4,774                                        | ≥10 mm = 681                                               | 18                               | 14/18 (78%)                                |
| Mandalakas et al. AJRCCM 2015 <sup>26</sup>   | Pediatric contacts aged 3m-15y (22% HIV+) | Cape Town, South Africa | 2008–2012         | 3 mos.                | 1,343 (1,044 HIV-negative, 299 HIV-positive) | ≥10 mm if HIV-negative = 436<br>≥5 mm if HIV-positive = 93 | 85                               | 57/85 (67%)                                |

Abbreviations: HIV=human immunodeficiency virus; LTBI = latent tuberculosis infection; N/A = not applicable; QFT-IT = QuantiFERON® Gold In-tube; TB = tuberculosis; TST = tuberculin skin test.

Summary of Test Sensitivity (calculated as the proportion of TST- or IGRA-positive cases among those who progressed to active TB):

### **QFT-IT**

#### HIV-negative, contacts

Range 51.3%–100%

Weighted average 80/109 (73.4%)

#### HIV-positive

Range 37.5%–100%

Weighted average 6/11 (54.5%)

#### Children<5

Only 1 study  
54/76 (71.1%)

## **TSPOT**

### HIV-negative, contacts

Range 50%–75%

Weighted average 36/56 (64.3%)

### HIV-positive

Range 40%–66.7%

Weighted average 10/19 (52.6%)

### Children<5

Range 62.5%–73.3%

Weighted average 56/87 (64.4%)

## **TST**

### HIV-negative, contacts

Range 54%–100%

Weighted average 143/180 (79%)

### HIV-positive

Range 0–64%

Weighted average 40/96 (42%)

### Children<5

Range 52%–100%

Weighted average 1,490/1,531 (97%)

Exclude Comstock-90/131

**Table S4.** Combinations of Test Result for Participants, by Group (by Using Borderline as Negative, Cutoff of  $\geq 8$  spots = Positive for TSPOT)

| Test Combination<br>(TST/QFT/TSPOT) | FB, HIV-,<br>5+ | FB, HIV-,<br><5 | FB, HIV+,<br>5+ | US, HIV-,<br>5+ | US, HIV+,<br>5+ |
|-------------------------------------|-----------------|-----------------|-----------------|-----------------|-----------------|
| ---                                 | 3,802           | 331             | 95              | 592             | 1,095           |
| --+                                 | 62              | 0               | 0               | 4               | 4               |
| -+-                                 | 186             | 2               | 8               | 22              | 54              |
| -++                                 | 133             | 0               | 0               | 10              | 9               |
| +-+                                 | 1,730           | 116             | 10              | 53              | 41              |
| ++-                                 | 136             | 0               | 0               | 5               | 0               |
| +++                                 | 415             | 7               | 10              | 16              | 9               |
| +++                                 | 1,467           | 8               | 17              | 73              | 14              |
| <b>Total</b>                        | <b>7,931</b>    | <b>464</b>      | <b>140</b>      | <b>775</b>      | <b>1,226</b>    |

Abbreviations: FB = foreign-born; HIV = human immunodeficiency virus; 5+ = age 5 years and older; <5=under 5 years of age; TST=tuberculin skin test; QFT=QuantiFERON Gold in-tube; TSPOT=TSPOT.TB; +=positive test; -=negative test

**Table S5.** Estimated Prevalence and Test Characteristics Derived from the Three-Test, Random Effects Model by Using the U.S. TSPOT Cutoff in Specified Groups, Treating Borderline Results (5-, 6-, or 7-spot Difference) as Negative. Parameter Values Are Mean Estimates with 95% Credible Intervals in Parentheses

| Parameter       | FB, HIV-, 5+      | FB, HIV-, <5      | FB, HIV+, 5+      | US, HIV-, 5+      | US, HIV+, 5+      |
|-----------------|-------------------|-------------------|-------------------|-------------------|-------------------|
| LTBI prevalence | 34.0% (27.7–39.3) | 3.6% (1.6–6.2)    | 15.2% (0.1–42.6)  | 17.3% (12.8–22.4) | 3.9% (2.4–5.8)    |
| TST             |                   |                   |                   |                   |                   |
| Sensitivity     | 80.6% (72.5–90.5) | 69.4% (58.7–80.0) | 57.7% (47.9–68.2) | 73.4% (62.7–85.4) | 54.5% (45.0–64.9) |
| Specificity     | 70.0% (68.3–71.5) | 73.7% (69.5–77.8) | 79.0% (64.7–95.2) | 92.2% (89.8–94.4) | 96.4% (95.2–97.5) |
| QFT-IT          |                   |                   |                   |                   |                   |
| Sensitivity     | 78.8% (69.5–90.2) | 73.4% (57.0–88.1) | 57.9% (38.6–74.7) | 77.8% (64.4–91.1) | 70.0% (55.3–83.9) |
| Specificity     | 98.5% (96.1–99.8) | 98.8% (97.2–99.8) | 82.7% (67.9–98.7) | 97.6% (95.7–99.3) | 95.7% (94.3–97.0) |
| TSPOT           |                   |                   |                   |                   |                   |
| Sensitivity     | 73.5% (63.8–86.3) | 56.7% (39.8–74.6) | 47.2% (31.5–68.0) | 66.1% (53.0–81.8) | 52.5% (38.1–68.2) |
| Specificity     | 99.3% (98.0–99.9) | 99.6% (98.8–99.9) | 91.8% (81.9–99.7) | 99.4% (98.5–99.9) | 99.6% (99.1–99.9) |

Abbreviations: HIV = human immunodeficiency virus; LTBI = latent tuberculosis infection; NPV = negative predictive value; PPV = positive predictive value; QFT-IT = QuantiFERON<sup>®</sup> Gold In-Tube; TSPOT = T-SPOT<sup>®</sup>.TB; TST = tuberculin skin test.

**Figure S1.** Latent tuberculosis prevalence and test characteristics (sensitivity and specificity) by prespecified groups. On the x-axis, the label “CI” stands for the model that assumes conditional independence of the tests, “R” stands for the model that includes a random effect (to model conditional dependence between the tests), and “Prior” shows the literature-based prior distribution (for test sensitivity only). The horizontal lines in the center of the rectangles are the Bayesian posterior means, whereas the top and bottom lines in each box are the boundaries of the first and third quartiles, respectively. The tips of the vertical lines span the 95% credible interval for each parameter. For purposes of this analysis, TSPOT was evaluated by using the international criteria for a positive test ( $\geq 6$  spots is positive;  $\leq 5$  spots is negative).

Abbreviations: CI=conditional independence model; prev = latent tuberculosis prevalence; Prior=scientific literature-based prior distribution (for test sensitivity only); R=random effect model; sensQFT = sensitivity of QuantiFERON<sup>®</sup> Gold In-Tube; sensTSPOT = sensitivity of T-SPOT<sup>®</sup>.TB; sensTST = sensitivity of the tuberculin skin test; specQFT = specificity of QuantiFERON Gold In-Tube; specTSPOT = specificity of T-SPOT.TB<sup>®</sup>; specTST = specificity of the tuberculin skin test.

## References

1. Zellweger JP, Sotgiu G, Block M, et al. Risk Assessment of Tuberculosis in Contacts by IFN-gamma Release Assays. A Tuberculosis Network European Trials Group Study. *Am J Respir Crit Care Med* 2015;191(10):1176-84. doi: 10.1164/rccm.201502-0232OC
2. Diel R, Loddenkemper R, Meywald-Walter K, et al. Predictive value of a whole blood IFN-gamma assay for the development of active tuberculosis disease after recent infection with *Mycobacterium tuberculosis*. *Am J Respir Crit Care Med* 2008;177(10):1164-70. doi: 10.1164/rccm.200711-1613OC
3. Diel R, Goletti D, Ferrara G, et al. Interferon-gamma release assays for the diagnosis of latent *Mycobacterium tuberculosis* infection: a systematic review and meta-analysis. *Eur Respir J* 2011;37(1):88-99. doi: 10.1183/09031936.00115110
4. Hill PC, Jackson-Sillah DJ, Fox A, et al. Incidence of tuberculosis and the predictive value of ELISPOT and Mantoux tests in Gambian case contacts. *PLoS One* 2008;3(1):e1379. doi: 10.1371/journal.pone.0001379
5. Kik SV, Franken WP, Mensen M, et al. Predictive value for progression to tuberculosis by IGRA and TST in immigrant contacts. *Eur Respir J* 2010;35(6):1346-53. doi: 10.1183/09031936.00098509
6. Lienhardt C, Fielding K, Hane AA, et al. Evaluation of the prognostic value of IFN-gamma release assay and tuberculin skin test in household contacts of infectious tuberculosis cases in Senegal. *PLoS One* 2010;5(5):e10508. doi: 10.1371/journal.pone.0010508
7. Yoshiyama T, Harada N, Higuchi K, et al. Use of the QuantiFERON-TB Gold test for screening tuberculosis contacts and predicting active disease. *Int J Tuberc Lung Dis* 2010;14(7):819-27.
8. Higuchi K, Harada N, Mori T, et al. Use of QuantiFERON-TB Gold to investigate tuberculosis contacts in a high school. *Respirology* 2007;12(1):88-92. doi: 10.1111/j.1440-1843.2006.01000.x
9. Bradshaw L, Davies E, Devine M, et al. The role of the interferon gamma release assay in assessing recent tuberculosis transmission in a hospital incident. *PLoS One* 2011;6(6):e20770. doi: 10.1371/journal.pone.0020770

10. Song S, Jeon D, Kim JW, et al. Performance of confirmatory interferon-gamma release assays in school TB outbreaks. *Chest* 2012;141(4):983-88. doi: 10.1378/chest.11-1158
11. Bakir M, Millington KA, Soysal A, et al. Prognostic value of a T-cell-based, interferon-gamma biomarker in children with tuberculosis contact. *Ann Intern Med* 2008;149(11):777-87.
12. Kruczak K, Duplaga M, Sanak M, et al. Comparison of IGRA tests and TST in the diagnosis of latent tuberculosis infection and predicting tuberculosis in risk groups in Krakow, Poland. *Scand J Infect Dis* 2014;46(9):649-55. doi: 10.3109/00365548.2014.927955
13. Pullar ND, Steinum H, Bruun JN, et al. HIV patients with latent tuberculosis living in a low-endemic country do not develop active disease during a 2 year follow-up; a Norwegian prospective multicenter study. *BMC infectious diseases* 2014;14:667. doi: 10.1186/s12879-014-0667-0
14. Santin M, Casas S, Saumoy M, et al. Detection of latent tuberculosis by the tuberculin skin test and a whole-blood interferon-gamma release assay, and the development of active tuberculosis in HIV-seropositive persons. *Diagn Microbiol Infect Dis* 2011;69(1):59-65. doi: 10.1016/j.diagmicrobio.2010.09.005
15. Aichelburg MC, Rieger A, Breitenecker F, et al. Detection and prediction of active tuberculosis disease by a whole-blood interferon-gamma release assay in HIV-1-infected individuals. *Clin Infect Dis* 2009;48(7):954-62. doi: 10.1086/597351
16. Jonnalagadda S, Lohman Payne B, Brown E, et al. Latent tuberculosis detection by interferon gamma release assay during pregnancy predicts active tuberculosis and mortality in human immunodeficiency virus type 1-infected women and their children. *J Infect Dis* 2010;202(12):1826-35. doi: 10.1086/657411
17. Lange B, Vavra M, Kern WV, et al. Development of tuberculosis in immunocompromised patients with a positive tuberculosis-specific IGRA. *Int J Tuberc Lung Dis* 2012;16(4):492-5. doi: 10.5588/ijtld.11.0416
18. Sester M, van Leth F, Bruchfeld J, et al. Risk assessment of tuberculosis in immunocompromised patients. A TBNET study. *Am J Respir Crit Care Med* 2014;190(10):1168-76. doi: 10.1164/rccm.201405-0967OC

19. Lee SS, Chou KJ, Su IJ, et al. High prevalence of latent tuberculosis infection in patients in end-stage renal disease on hemodialysis: Comparison of QuantiFERON-TB GOLD, ELISPOT, and tuberculin skin test. *Infection* 2009;37(2):96-102. doi: 10.1007/s15010-008-8082-3
20. Chang B, Park HY, Jeon K, et al. Interferon-gamma release assay in the diagnosis of latent tuberculosis infection in arthritis patients treated with tumor necrosis factor antagonists in Korea. *Clin Rheumatol* 2011;30(12):1535-41. doi: 10.1007/s10067-011-1771-9
21. Leung CC, Yam WC, Yew WW, et al. T-Spot.TB outperforms tuberculin skin test in predicting tuberculosis disease. *Am J Respir Crit Care Med* 2010;182(6):834-40. doi: 10.1164/rccm.200912-1875OC
22. Kim SH, Lee SO, Park JB, et al. A prospective longitudinal study evaluating the usefulness of a T-cell-based assay for latent tuberculosis infection in kidney transplant recipients. *Am J Transplant* 2011;11(9):1927-35. doi: 10.1111/j.1600-6143.2011.03625.x
23. Harstad I, Winje BA, Heldal E, et al. Predictive values of QuantiFERON-TB Gold testing in screening for tuberculosis disease in asylum seekers. *Int J Tuberc Lung Dis* 2010;14(9):1209-11.
24. Mahomed H, Hawkrigde T, Verver S, et al. The tuberculin skin test versus QuantiFERON TB Gold(R) in predicting tuberculosis disease in an adolescent cohort study in South Africa. *PLoS One* 2011;6(3):e17984. doi: 10.1371/journal.pone.0017984
25. Schablon A, Diel R, Diner G, et al. Specificity of a whole blood IGRA in German nursing students. *BMC infectious diseases* 2011;11:245. doi: 10.1186/1471-2334-11-245
26. Mandalakas AM, Kirchner HL, Walzl G, et al. Optimizing the detection of recent tuberculosis infection in children in a high tuberculosis-HIV burden setting. *Am J Respir Crit Care Med* 2015;191(7):820-30. doi: 10.1164/rccm.201406-1165OC
27. Sackoff JE, Torian LV, Frieden TR. TB prevention in HIV clinics in New York City. *Int J Tuberc Lung Dis* 2001;5(2):123-8.
28. Zhang LF, Liu XQ, Zhang Y, et al. A prospective longitudinal study evaluating a T-cell-based assay for latent tuberculosis infection in health-care workers in a general hospital in Beijing. *Chin Med J (Engl)* 2013;126(11):2039-44.



29. Torres Costa J, Silva R, Ringshausen FC, et al. Screening for tuberculosis and prediction of disease in Portuguese healthcare workers. *J Occup Med Toxicol* 2011;6:19. doi: 10.1186/1745-6673-6-19
30. Comstock GW, Livesay VT, Woolpert SF. The prognosis of a positive tuberculin reaction in childhood and adolescence. *Am J Epidemiol* 1974;99(2):131-8.
31. Daley CL, Hahn JA, Moss AR, et al. Incidence of tuberculosis in injection drug users in San Francisco: impact of anergy. *Am J Respir Crit Care Med* 1998;157(1):19-22. doi: 10.1164/ajrccm.157.1.9701111
32. del Corral H, Paris SC, Marin ND, et al. IFN $\gamma$  response to *Mycobacterium tuberculosis*, risk of infection and disease in household contacts of tuberculosis patients in Colombia. *PLoS One* 2009;4(12):e8257. doi: 10.1371/journal.pone.0008257
33. Giri P, Basu S, Sargeant T, et al. Pre-placement screening for tuberculosis in healthcare workers. *Occup Med (Lond)* 2014;64(7):524-9. doi: 10.1093/occmed/kqu107
34. Gourevitch MN, Hartel D, Selwyn PA, et al. Effectiveness of isoniazid chemoprophylaxis for HIV-infected drug users at high risk for active tuberculosis. *AIDS* 1999;13(15):2069-74.
35. Guwatudde D, Nakakeeto M, Jones-Lopez EC, et al. Tuberculosis in household contacts of infectious cases in Kampala, Uganda. *Am J Epidemiol* 2003;158(9):887-98.
36. Higuchi K, Kondo S, Wada M, et al. Contact investigation in a primary school using a whole blood interferon-gamma assay. *J Infect* 2009;58(5):352-7. doi: 10.1016/j.jinf.2009.02.019
37. Jeyakumar D. Tuberculin reactivity and subsequent development of tuberculosis in a cohort of student nurses. *Med J Malaysia* 1999;54(4):492-5.
38. Leow MK, Dalan R, Chee CB, et al. Latent tuberculosis in patients with diabetes mellitus: prevalence, progression and public health implications. *Exp Clin Endocrinol Diabetes* 2014;122(9):528-32. doi: 10.1055/s-0034-1377044
39. Leung CC, Yew WW, Chang KC, et al. Risk of active tuberculosis among schoolchildren in Hong Kong. *Arch Pediatr Adolesc Med* 2006;160(3):247-51. doi: 10.1001/archpedi.160.3.247

40. Markowitz N, Hansen NI, Hopewell PC, et al. Incidence of tuberculosis in the United States among HIV-infected persons. The Pulmonary Complications of HIV Infection Study Group. *Ann Intern Med* 1997;126(2):123-32.
41. Rakotosamimanana N, Richard V, Raharimanga V, et al. Biomarkers for risk of developing active tuberculosis in contacts of TB patients: a prospective cohort study. *Eur Respir J* 2015;46(4):1095-103. doi: 10.1183/13993003.00263-2015
42. Doherty TM, Demissie A, Olobo J, et al. Immune responses to the Mycobacterium tuberculosis-specific antigen ESAT-6 signal subclinical infection among contacts of tuberculosis patients. *J Clin Microbiol* 2002;40(2):704-6.
43. Rueda ZV, Arroyave L, Marin D, et al. High prevalence and risk factors associated with latent tuberculous infection in two Colombian prisons. *Int J Tuberc Lung Dis* 2014;18(10):1166-71. doi: 10.5588/ijtld.14.0179
44. Selwyn PA, Sckell BM, Alcabes P, et al. High risk of active tuberculosis in HIV-infected drug users with cutaneous anergy. *JAMA* 1992;268(4):504-9.
45. Silverman MS, Reynolds D, Kavsak PA, et al. Use of an interferon-gamma based assay to assess bladder cancer patients treated with intravesical BCG and exposed to tuberculosis. *Clin Biochem* 2007;40(12):913-5. doi: 10.1016/j.clinbiochem.2007.04.006
46. Thomas TA, Mondal D, Noor Z, et al. Malnutrition and helminth infection affect performance of an interferon gamma-release assay. *Pediatrics* 2010;126(6):e1522-9. doi: 10.1542/peds.2010-0885
47. Wyndham-Thomas C, Dirix V, Schepers K, et al. Contribution of a heparin-binding haemagglutinin interferon-gamma release assay to the detection of Mycobacterium tuberculosis infection in HIV-infected patients: comparison with the tuberculin skin test and the QuantiFERON-TB Gold In-tube. *BMC infectious diseases* 2015;15:59. doi: 10.1186/s12879-015-0796-0
48. Joshi R, Narang U, Zwerling A, et al. Predictive value of latent tuberculosis tests in Indian healthcare workers: a cohort study. *Eur Respir J* 2011;38(6):1475-7. doi: 10.1183/09031936.00014611

49. Sloot R, Schim van der Loeff MF, Kouw PM, et al. Risk of tuberculosis after recent exposure. A 10-year follow-up study of contacts in Amsterdam. *Am J Respir Crit Care Med* 2014;190(9):1044-52. doi: 10.1164/rccm.201406-1159OC
